# Supplementary material for: Hot spot formation and initial chemical reaction of PETN containing nanoscale spherical voids under high shock loading
Source: Royal Society of Chemistry journal article supplement (doi:10.1039/d2ra00417h), 2022-01-01
Supplement: d2ra00417h1.pdf [file d2ra00417h1.pdf]

## Supplementary Information

# Hot Spot Formation and Initial Chemical Reaction of PETN Containing Nanoscale Spherical Void Under Highly Shocked Loading

Yaping Zhang <sup>a, b</sup>, Tao Wang <sup>a, \*</sup>, and Yuanhang He <sup>c, \*</sup>

<sup>a</sup> Institute of Intelligent Manufacturing Technology, Shenzhen Polytechnic, Shenzhen,  
518055, China

<sup>b</sup> Shenzhen Institutes of Advanced Technology, Chinese Academy of Sciences, Shenzhen,  
518055, China

<sup>c</sup> State Key Laboratory of Explosion Science and Technology, Beijing Institute of  
Technology, Beijing 100081, China

### S1. The method of subtracting the center-of-mass velocity.

The local velocity  $\langle u \rangle_i$  is defined in terms of its own center-of-mass velocity and those of its neighbor molecules velocities  $u_j$ , and is given by:

$$\langle u \rangle_i = \frac{\sum_j w(r_{ij})u_j}{\sum_j w(r_{ij})}$$

The local intermolecular temperature  $T_i$  is given by:

$$\frac{3}{2}k\langle T \rangle_i^{inter} = \frac{\frac{1}{2} \sum_j M_j w(r_{ij}) u_j |u_j - \langle u \rangle_i|^2}{\sum_j w(r_{ij})}$$

Where  $k$  is Boltzmann's constant,  $M_j$  is the total mass of the molecule.

The intermolecular temperature is given by:

$$\frac{3}{2}N_i^{at}kT_i^{inter} = \frac{1}{2} \sum_{j=1}^{N_i^{at}} m_j (u_j - u_i^{cm})^2$$

Where  $N_i^{at}$  is the number of degrees of freedom,  $u_j$  is the velocity of atom  $j$ ,  $u_i^{cm}$  is the center of mass velocity.

S2.

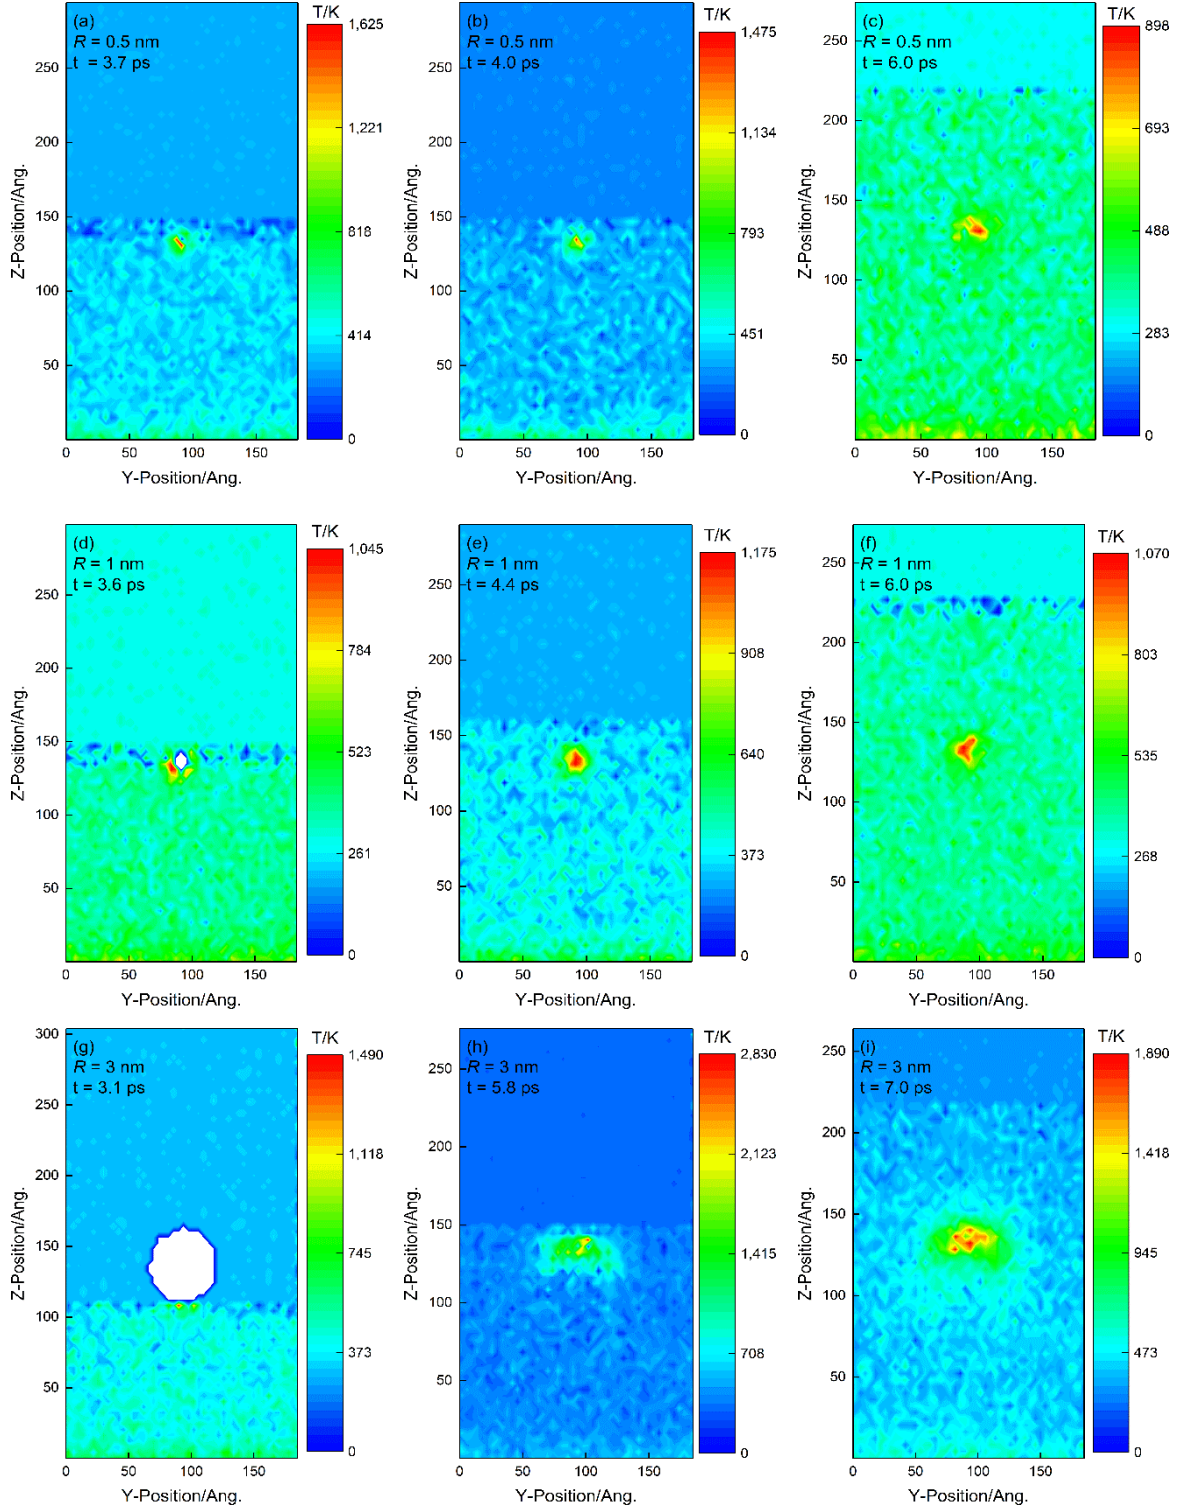

Fig. S1. The spatial-temporal temperature distribution of the void collapse for the case of  $U_p$

$= 1 \text{ km} \cdot \text{s}^{-1}$ . (a), (b), (c) correspond to the cavity radius  $R = 0.5 \text{ nm}$ ; (d), (e), (f) correspond to the cavity radius  $R = 1 \text{ nm}$ ; (g), (h), (i) correspond to the cavity radius  $R = 3 \text{ nm}$ .

**S3.**

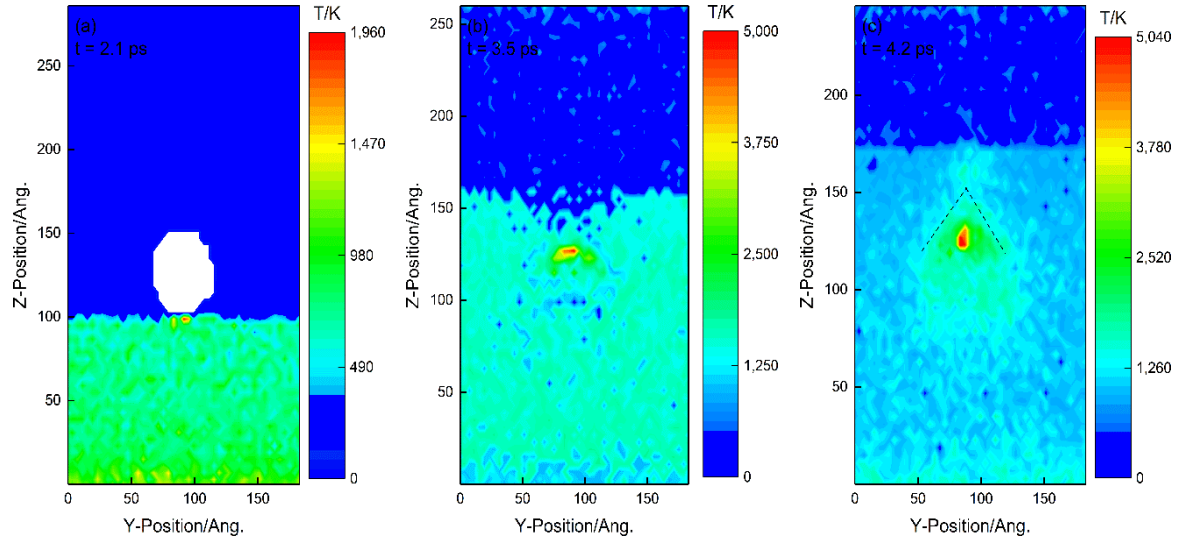

**Fig. S2.** The spatial-temporal temperature distribution of the hot spot formation process for the case of  $U_p = 1 \text{ km} \cdot \text{s}^{-1}$ ,  $R = 3 \text{ nm}$ .

S4.

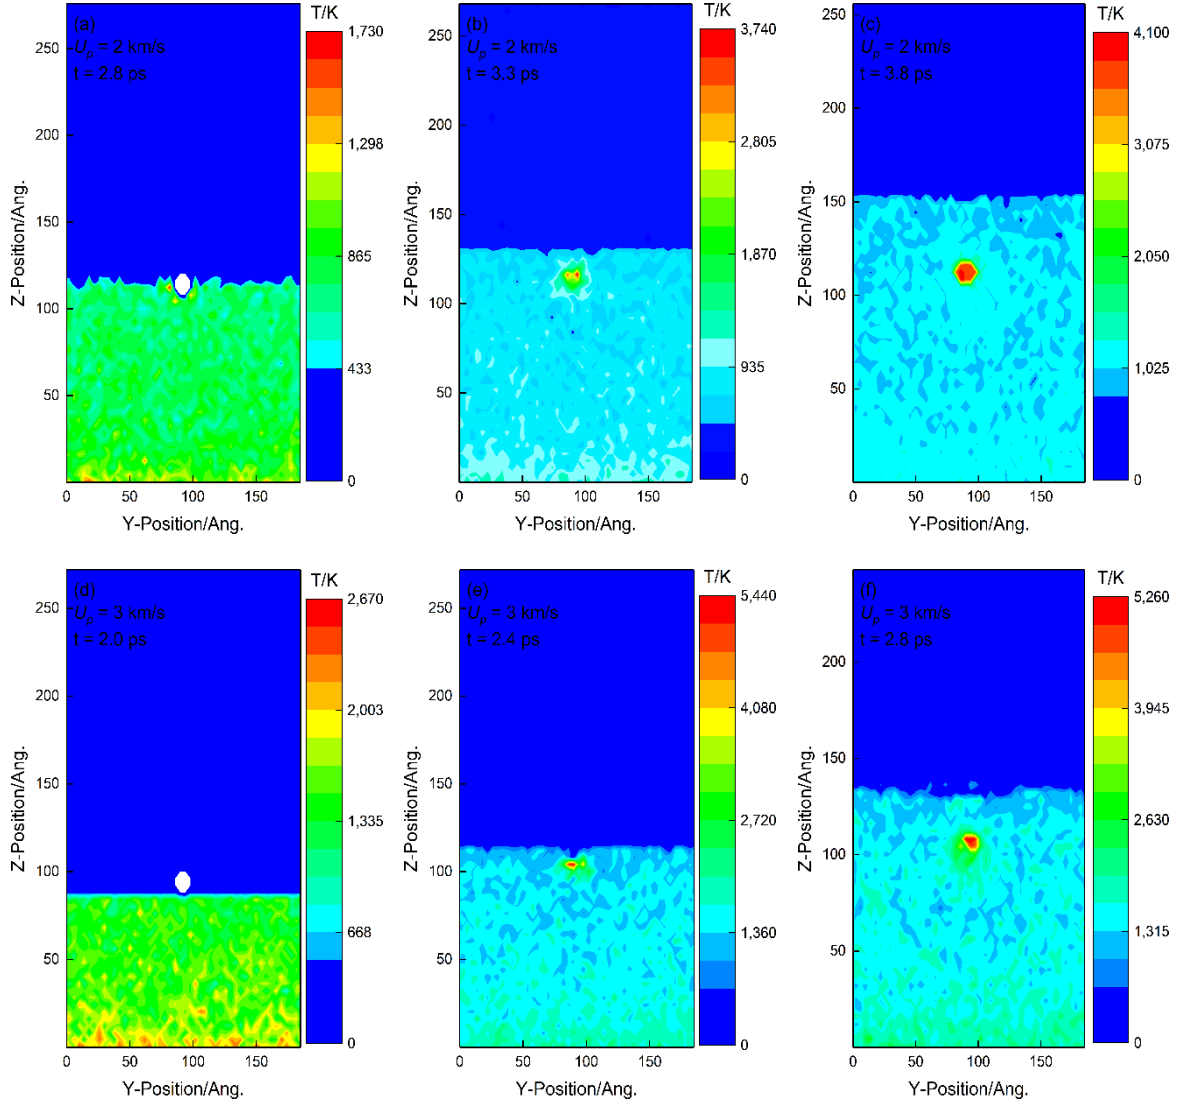

**Fig. S3.** Hot spot formation process for PETN system with cavity radius  $R = 1 \text{ nm}$  at  $U_p = 2 \text{ km}\cdot\text{s}^{-1}$ ,  $U_p = 3 \text{ km}\cdot\text{s}^{-1}$ . (a), (b), (c) correspond to  $U_p = 2 \text{ km}\cdot\text{s}^{-1}$ ; (d), (e), (f) correspond to  $U_p = 3 \text{ km}\cdot\text{s}^{-1}$ .
